# Supplementary material
Source: PubMed Central journal article supplement (PMC11029796)
Supplement: 262_2016_1836_MOESM1_ESM.pdf [file 262_2016_1836_MOESM1_ESM.pdf]

| Patient no. | Age (y.) | Sex (F/M) | Histology at first diagnosis | Treatment arm | Axitinib at 6 wks (mg) | Evolution of corticosteroid treatment | Best Overall Response |        |
|-------------|----------|-----------|------------------------------|---------------|------------------------|---------------------------------------|-----------------------|--------|
|             |          |           |                              |               |                        |                                       | 6 wks                 | 12 wks |
| 1           | 48       | F         | de novo GBM                  | Axitinib+CCNU | 7                      | decrease                              | uPR                   | PR     |
| 2           | 63       | M         | de novo GBM                  | Axitinib+CCNU | 2                      | decrease                              | uPR                   | PR     |
| 3           | 24       | M         | grade 2 astrocytoma          | Axitinib      | 5                      | increase                              | uPR                   | PD     |
| 5           | 57       | F         | grade 2 astrocytoma          | Axitinib+CCNU | 7                      | stable                                | uPR                   | PD     |
| 6           | 39       | F         | de novo GBM                  | Axitinib+CCNU | 5                      | decrease                              | uPR                   | PD     |
| 7           | 64       | M         | de novo GBM                  | Axitinib      | 5                      | decrease                              | uPR                   | PD     |
| 8           | 51       | F         | de novo GBM                  | Axitinib      | 5                      | decrease                              | uPR                   | PD     |
| 9           | 59       | F         | de novo GBM                  | Axitinib      | 5                      | decrease                              | uSD                   | SD     |
| 10          | 53       | M         | de novo GBM                  | Axitinib+CCNU | 5                      | stable                                | uSD                   | SD     |
| 11          | 44       | M         | grade 2 astrocytoma          | Axitinib+CCNU | 3                      | increase                              | PD                    |        |
| 12          | 48       | M         | de novo GBM                  | Axitinib+CCNU | 5                      | stable                                | uSD                   | SD     |
| 14          | 69       | F         | de novo GBM                  | Axitinib      | 5                      | decrease                              | uPR                   | PR     |
| 15          | 35       | M         | de novo GBM                  | Axitinib      | 5                      | stable                                | uPR                   | PD     |
| 16          | 64       | M         | grade 3 oligodendroglioma    | Axitinib      | 5                      | stable                                | uPR                   | PR     |
| 17          | 52       | M         | grade 3 oligodendroglioma    | Axitinib      | 7                      | stable                                | uPR                   | PR     |
| 18          | 57       | F         | de novo GBM                  | Axitinib      | 5                      | stable                                | uPR                   | PD     |
| 19          | 48       | M         | anaplastic astrocytoma       | Axitinib      | 7                      | decrease                              | PD                    |        |
| 20          | 28       | M         | de novo GBM                  | Axitinib+CCNU | 5                      | stable                                | SD                    | SD     |

**Supplementary table 1: patient characteristics and tumor response**

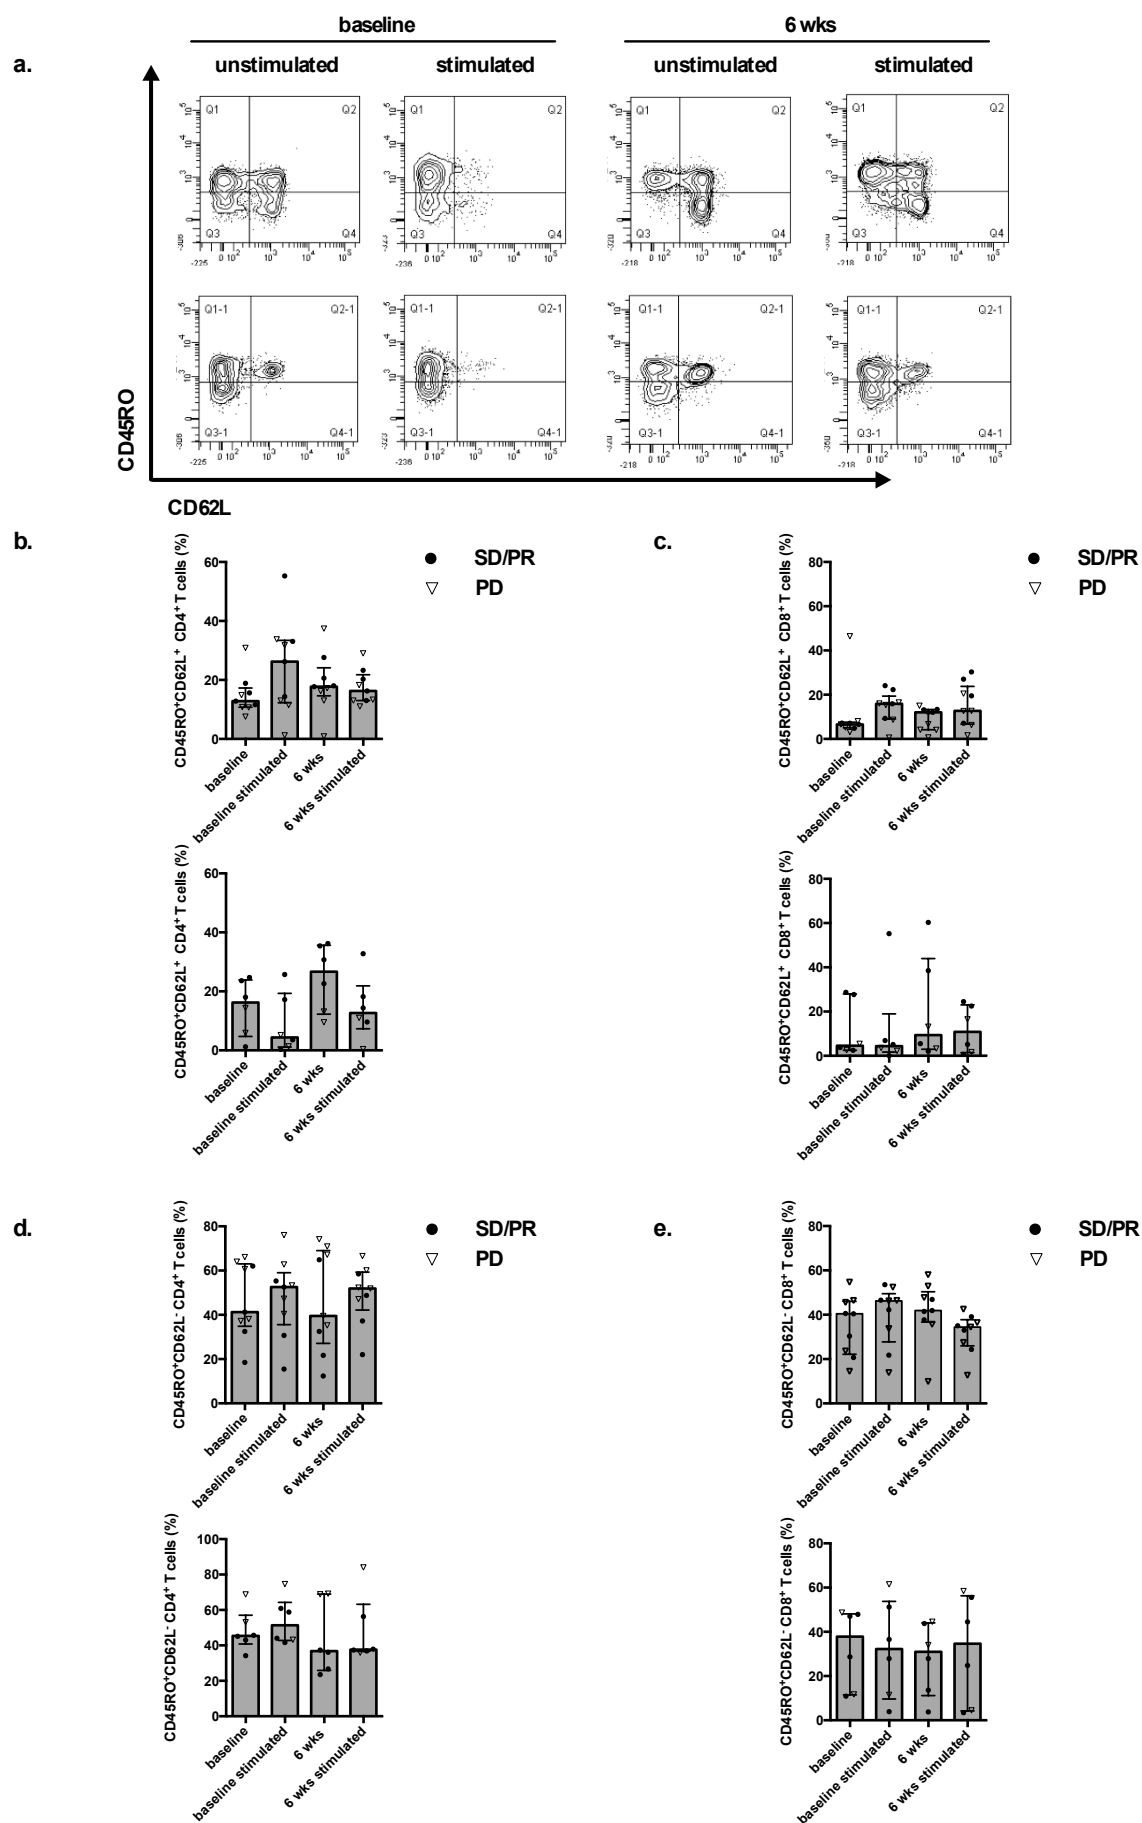

**Supplementary Figure 1: Axitinib or axitinib plus lomustine does not influence the number of TEM CD4<sup>+</sup> and CD8<sup>+</sup> T cells.** The percentages of T-cell subsets within CD4<sup>+</sup> and CD8<sup>+</sup> T cells were determined with flow cytometry after treatment with axitinib or axitinib plus lomustine. Gating strategy for the determination of the different T cells subsets (a). Percentages of T<sub>CM</sub> CD4<sup>+</sup> T cells (b) and T<sub>CM</sub> CD8<sup>+</sup> T cells (c) as determined in absence or presence of anti-CD3/CD28 beads at baseline and at 6 weeks after axitinib (n=9) (upper panel) or axitinib plus lomustine treatment (n=6) (lower panel). Percentages of T<sub>EM</sub> CD4<sup>+</sup> T cells (CD45RO<sup>+</sup> CD62L<sup>-</sup> CD4<sup>+</sup> T cells)(d) and T<sub>EM</sub> CD8<sup>+</sup> T cells (CD45RO<sup>+</sup> CD62L<sup>-</sup> CD8<sup>+</sup> T cells)(e) as determined in absence or presence of anti-CD3/CD28 beads at baseline and at 6 weeks after axitinib (n=9) (upper panel) or axitinib plus lomustine treatment (n=6) (lower panel). Data are represented as median with interquartile range.

**a.**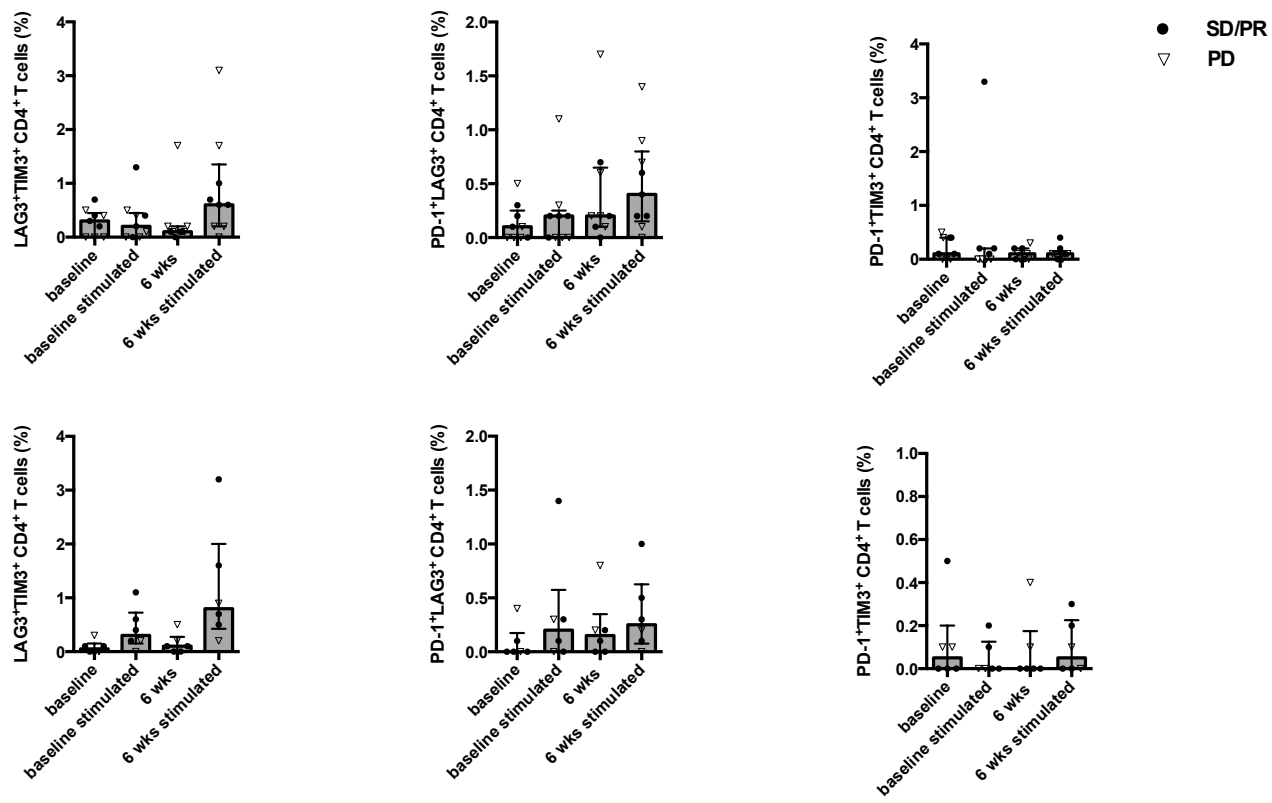**b.**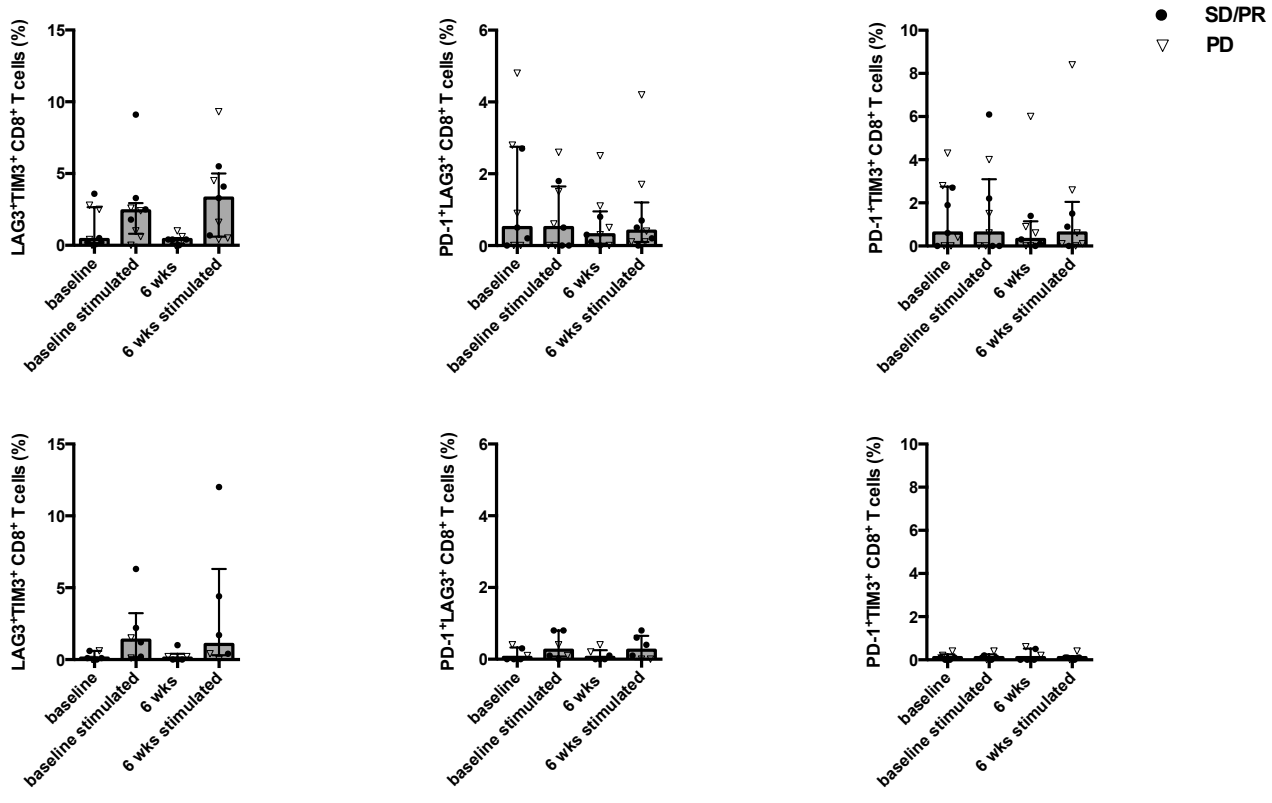

**Supplementary Figure 2: Axitinib or axitinib plus lomustine does not affect the co-expression of LAG3, TIM3 and PD-1 on CD4+ and CD8+ T cells**

The percentages of LAG3, TIM3 and PD-1 were determined on CD4<sup>+</sup> and CD8<sup>+</sup> T cells at baseline and at 6 weeks after treatment. Percentages of LAG3<sup>+</sup>TIM3<sup>+</sup>CD4<sup>+</sup> T cells (left panel), PD-1<sup>+</sup>LAG3<sup>+</sup>CD4<sup>+</sup> T cells (middle part) and PD-1<sup>+</sup>TIM3<sup>+</sup>CD4<sup>+</sup> T cells (right part)(a) and LAG3<sup>+</sup>TIM3<sup>+</sup>CD8<sup>+</sup> T cells (left panel), PD-1<sup>+</sup>LAG3<sup>+</sup>CD8<sup>+</sup> T cells (middle panel) and PD-1<sup>+</sup>TIM3<sup>+</sup>CD8<sup>+</sup> T cells (right panel) (b) as determined after polyclonal stimulation at baseline and at 6 weeks after axitinib (n=9) (upper panel) or axitinib plus lomustine treatment (n=6) (lower panel). Data are represented as median with interquartile range.
